# Supplementary material for: Comparison of 0.12% Chlorhexidine and a New Bone Bioactive Liquid, BBL, in Mouthwash for Oral Wound Healing: A Randomized, Double Blind Clinical Human Trial
Source: MDPI journal article supplement (doi:10.3390/jpm12101725), 2022-10-16
Supplement: s1 [file s1]

Supplementary Table S1: The sociodemographic characteristics of the patients involved in the study.

| Sociodemographic characteristics      | Number | Percentage |
|---------------------------------------|--------|------------|
| <b>Age, years</b>                     |        |            |
| 0–20                                  | 2      | 2.47%      |
| 21–30                                 | 4      | 4.94%      |
| 31–40                                 | 19     | 23.46%     |
| 41–50                                 | 32     | 39.51%     |
| 51–64                                 | 24     | 29.63%     |
| <b>Sex</b>                            |        |            |
| Male                                  | 37     | 45.68%     |
| Female                                | 44     | 54.32%     |
| <b>Nationality</b>                    |        |            |
| Spanish                               | 54     | 66.67%     |
| Other nationalities                   | 27     | 33.33%     |
| <b>Marital status</b>                 |        |            |
| Married                               | 57     | 70.37%     |
| Single                                | 21     | 25.93%     |
| Divorced                              | 3      | 3.70%      |
| <b>Availability of social support</b> |        |            |
| Yes                                   | 18     | 22.22%     |
| No                                    | 63     | 77.78%     |
| <b>Education level</b>                |        |            |
| Primary school                        | 1      | 1.23%      |
| High school                           | 53     | 65.43%     |
| University                            | 20     | 24.69%     |
| Postgraduate                          | 7      | 8.64%      |
| <b>Employment</b>                     |        |            |
| Yes                                   | 67     | 82.72%     |
| No                                    | 14     | 17.28%     |
| <b>Socioeconomic status</b>           |        |            |
| Low                                   | 27     | 33.33%     |
| Average                               | 48     | 59.26%     |
| High                                  | 6      | 7.41%      |

Supplementary Table S2: Healing Index as described by Landry et. al. 1988.

| Healing index Score                        | Tissue color          | Bleeding on palpation | Granulation tissue | Incision margin                                                 | Suppuration |
|--------------------------------------------|-----------------------|-----------------------|--------------------|-----------------------------------------------------------------|-------------|
| 1—very poor, Two or more signs are present | 2: 50% of red gingiva | Yes                   | Yes                | Not epithelized, with loss of epithelium beyond incision margin | Yes         |
| 2—poor                                     | 2: 50% of red gingiva | Yes                   | Yes                | Not epithelized, with exposed connective tissue                 | No          |
| 3—good                                     | 25–50% of red gingiva | No                    | No                 | No exposed connective tissue                                    | No          |
| 4—very good                                | < 25% of red gingiva  | No                    | No                 | No exposed connective tissue                                    | No          |
| 5—excellent                                | All pink tissues      | No                    | No                 | No exposed connective tissue                                    | No          |
